# Supplementary material for: In Vivo Evaluation of the Wound Healing Activity of Extracts and Bioactive Constituents of the Marine Isopod Ceratothoa oestroides
Source: MDPI journal article supplement (doi:10.3390/md18040219), 2020-04-18
Supplement: s1 [file s1]

**Supplementary Materials for**

***In vivo* Evaluation of the Wound Healing Activity of  
Extracts and Bioactive Constituents of the Marine  
Isopod *Ceratothoa oestroides***

**Evgenia Sofrona <sup>1,2</sup>, Leto-Aikaterini Tziveleka <sup>1</sup>, Maria Harizani <sup>1</sup>, Panagiota Koroli <sup>2</sup>, Ioannis Sfiniadakis <sup>3</sup>, Vassilios Roussis <sup>1</sup>, Michail Rallis <sup>2,\*</sup> and Efstathia Ioannou <sup>1,\*</sup>**

<sup>1</sup> Section of Pharmacognosy and Chemistry of Natural Products, Department of Pharmacy, School of Health Sciences, National and Kapodistrian University of Athens, Athens 15771, Greece; evgenia.sofrona@gmail.com (E.S.); ltziveleka@pharm.uoa.gr (L.A.T.); mariachariz@pharm.uoa.gr (M.H.); roussis@pharm.uoa.gr (V.R.)

<sup>2</sup> Section of Pharmaceutical Technology, Department of Pharmacy, School of Health Sciences, National and Kapodistrian University of Athens, Athens 15784, Greece; giotakor17@hotmail.com (P.K.)

<sup>3</sup> Athens Naval Hospital, Pathologoanatomic Laboratory, Athens 11521, Greece; jsfiniadakis@yahoo.gr (I.S.)

\* Correspondence: rallis@pharm.uoa.gr (M.R.); eioannou@pharm.uoa.gr (E.I.); Tel.: +30-210-7274699 (M.R.); +30-210-7274913 (E.I.).

## Table of Contents

|                                                                                                                                                                                                                                                                                                                                                                                                                                                                                                                                                                                                                                                                                                                                                                                                                                                                                                  |    |
|--------------------------------------------------------------------------------------------------------------------------------------------------------------------------------------------------------------------------------------------------------------------------------------------------------------------------------------------------------------------------------------------------------------------------------------------------------------------------------------------------------------------------------------------------------------------------------------------------------------------------------------------------------------------------------------------------------------------------------------------------------------------------------------------------------------------------------------------------------------------------------------------------|----|
| <b>Figure S1.</b> TEWL values for the various mice groups receiving different treatments (no treatment, control; 1% olive oil extract, COOE; 1% total organic extract, COTOE; 1% cHex extract, COA; 1% CH <sub>2</sub> Cl <sub>2</sub> extract, COB; 1% <i>n</i> -BuOH extract, COC; 1% H <sub>2</sub> O extract, COD) on day 18 of the experiment. Values are presented as the mean±SD (n=3-4 mice per group). One-way ANOVA followed by Tukey's test was applied for comparison between the extract-treated mice groups and the negative control (* <i>p</i> <0.05 vs control).                                                                                                                                                                                                                                                                                                                | S3 |
| <b>Figure S2.</b> (A) TEWL values for male and female mice groups receiving different treatments (ointment base, BASE; Madecassol; 1% olive oil extract, COOE; 1% CH <sub>2</sub> Cl <sub>2</sub> extract, COB; 1% H <sub>2</sub> O extract, COD) on day 1 and day 25 of the experiment. (B) Hydration values for male and female mice groups receiving different treatments on day 1 and day 25 of the experiment. (C) Skin elasticity values for male and female mice groups receiving different treatments on day 1 and day 25 of the experiment. (D) Skin thickness values (mm) for male and female mice groups receiving different treatments on day 1 and day 25 of the experiment. Values are presented as the mean±SD (n=7 animals per group). One-way ANOVA followed by Tukey's test was applied for comparison between the treated mice and the control (* <i>p</i> <0.05 vs control). | S3 |
| <b>Figure S3.</b> Representative histopathological images of male and female mice skin after treatment with the ointment base (A and B, respectively), Madecassol (C and D, respectively), 1% COB extract (E and F, respectively) or 1% COD extract (G and H, respectively) (magnification 100× (C-G), 200× (A, B) and 400× (H)). Samples were stained with hematoxylin and eosin.                                                                                                                                                                                                                                                                                                                                                                                                                                                                                                               | S4 |
| <b>Figure S4.</b> <sup>1</sup> H NMR spectrum of fraction COB-A in CDCl <sub>3</sub> .                                                                                                                                                                                                                                                                                                                                                                                                                                                                                                                                                                                                                                                                                                                                                                                                           | S5 |
| <b>Figure S5.</b> <sup>1</sup> H NMR spectrum of fraction COB-B in CDCl <sub>3</sub> .                                                                                                                                                                                                                                                                                                                                                                                                                                                                                                                                                                                                                                                                                                                                                                                                           | S5 |
| <b>Figure S6.</b> <sup>1</sup> H NMR spectrum of fraction COB-C in CDCl <sub>3</sub> .                                                                                                                                                                                                                                                                                                                                                                                                                                                                                                                                                                                                                                                                                                                                                                                                           | S6 |
| <b>Figure S7.</b> (A) TEWL values for the various mice groups receiving different treatments (no treatment, control; ointment base, BASE; 1%, 2%, and 4% CH <sub>2</sub> Cl <sub>2</sub> extract, COB1%; COB2% and COB4%, respectively; 0.3% COB-A fraction, COB-A; 0.3% COB-B fraction; COB-B; 0.3% COB-C fraction, COB-C) on day 1 and day 24 of the experiment. (B) Hydration values for the various mice groups on day 1 and day 24 of the experiment. Values are presented as the mean±SD (n=4 mice per group). One-way ANOVA followed by Tukey's test was applied for comparison between the treated mice and the control (* <i>p</i> <0.05 vs control).                                                                                                                                                                                                                                   | S6 |

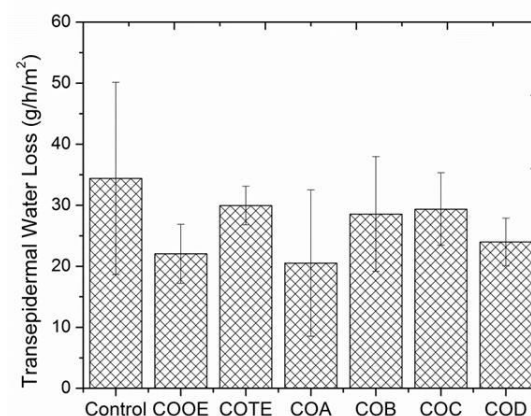

**Figure S1.** TEWL values for the various mice groups receiving different treatments (no treatment, control; 1% olive oil extract, COOE; 1% total organic extract, COTE; 1% cHex extract, COA; 1% CH<sub>2</sub>Cl<sub>2</sub> extract, COB; 1% *n*-BuOH extract, COC; 1% H<sub>2</sub>O extract, COD) on day 18 of the experiment. Values are presented as the mean±SD (n=3-4 mice per group). One-way ANOVA followed by Tukey's test was applied for comparison between the extract-treated mice groups and the negative control (\**p*<0.05 vs control).

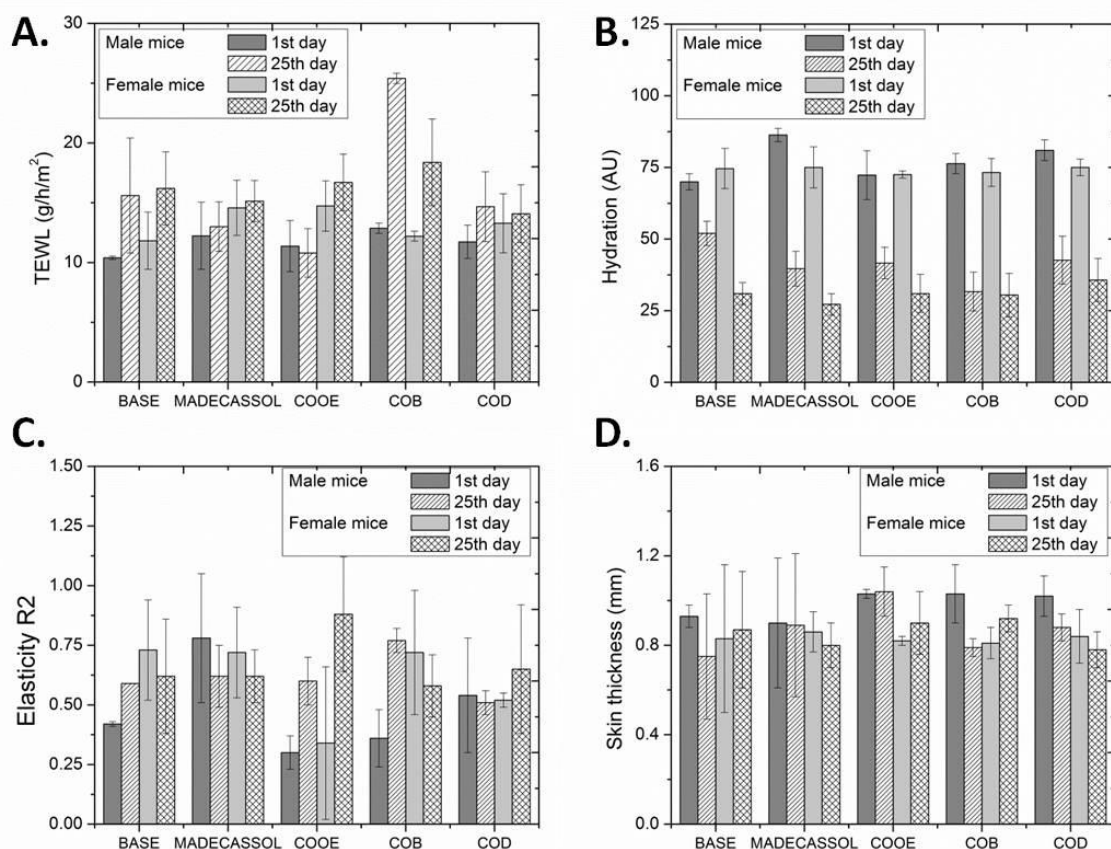

**Figure S2.** (A) TEWL values for male and female mice groups receiving different treatments (ointment base, BASE; Madecassol; 1% olive oil extract, COOE; 1% CH<sub>2</sub>Cl<sub>2</sub> extract, COB; 1% H<sub>2</sub>O extract, COD) on day 1 and day 25 of the experiment. (B) Hydration values for male and female mice groups receiving different treatments on day 1 and day 25 of the experiment. (C) Skin elasticity values for male and female mice groups receiving different treatments on day 1 and day 25 of the experiment. (D) Skin thickness values (mm) for male and female mice groups receiving different treatments on day 1 and day 25 of the experiment. Values are presented as the mean±SD (n=7 animals per group). One-way ANOVA followed by Tukey's test was applied for comparison between the treated mice and the control (\**p*<0.05 vs control).

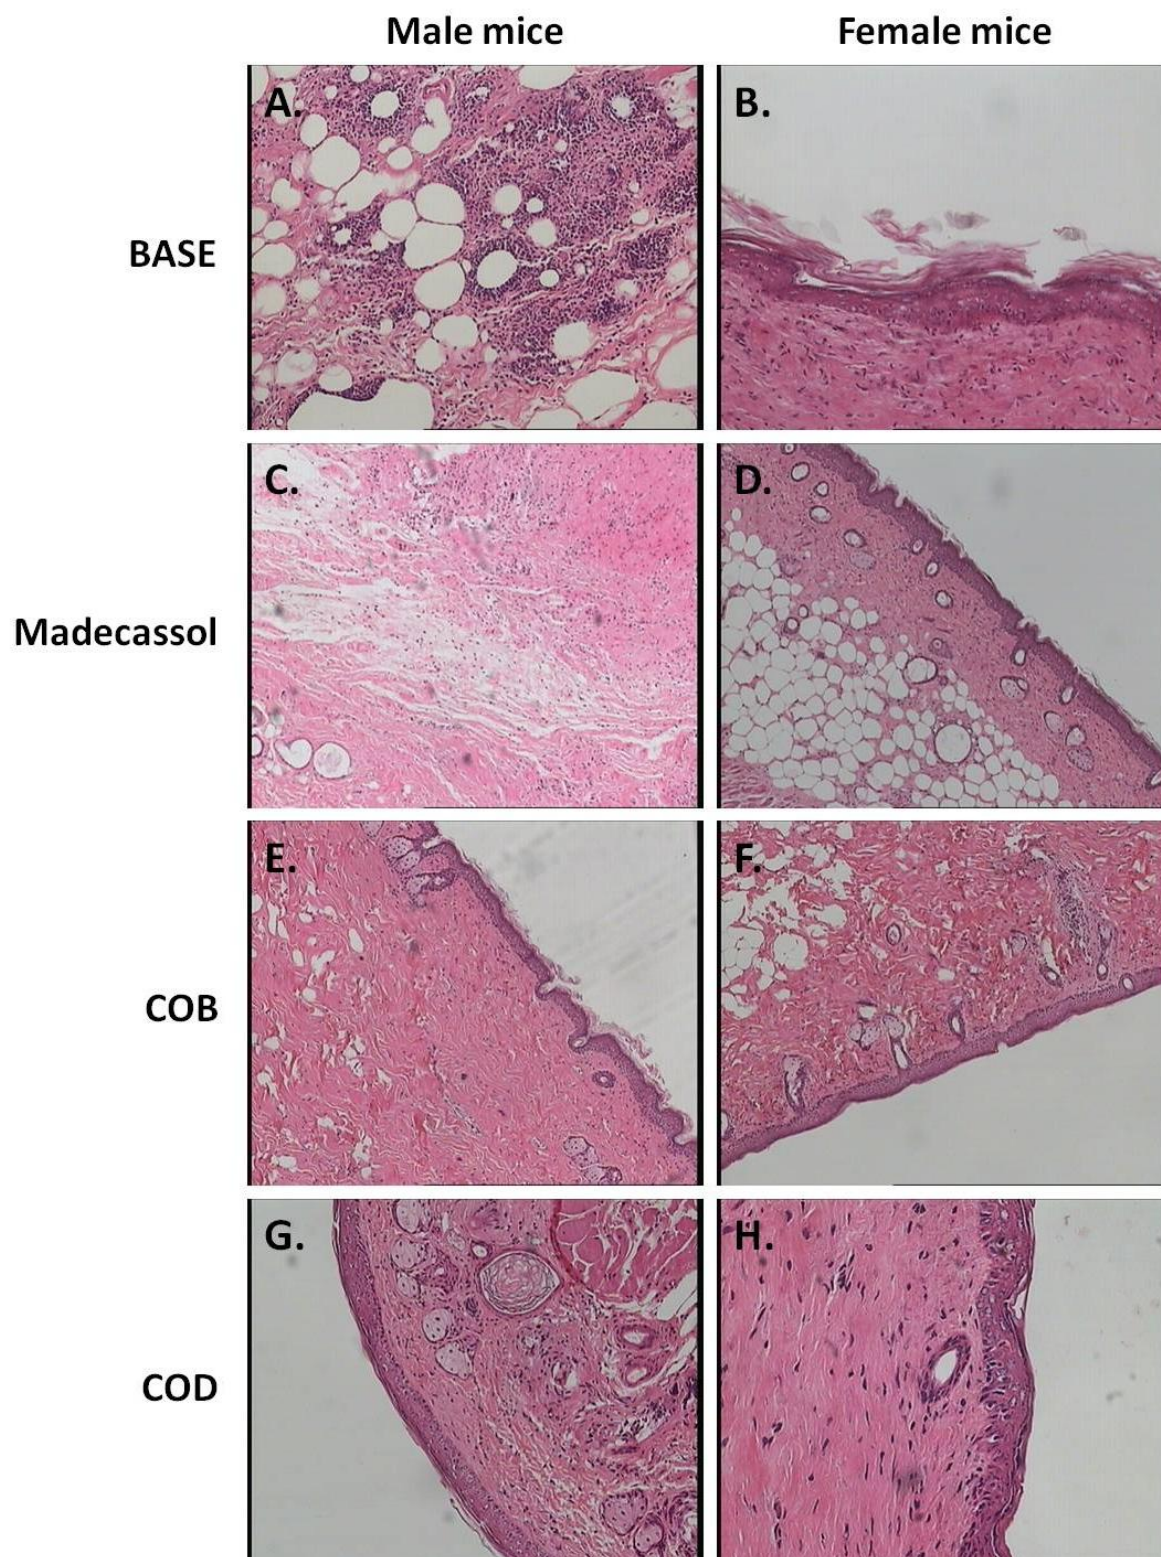

**Figure S3.** Representative histopathological images of male and female mice skin after treatment with the ointment base (A and B, respectively), Madecassol (C and D, respectively), 1% COB extract (E and F, respectively) or 1% COD extract (G and H, respectively) (magnification 100× (C-G), 200× (A, B) and 400× (H)). Samples were stained with hematoxylin and eosin.

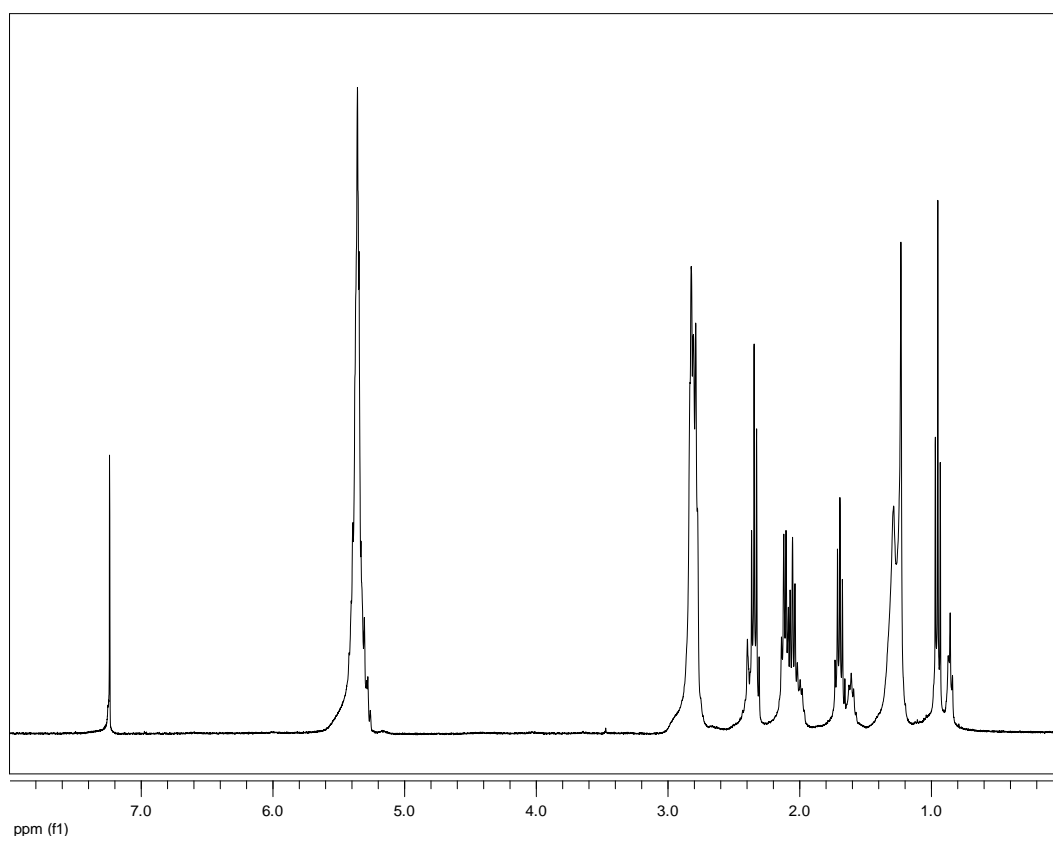

**Figure S4.**  $^1\text{H}$  NMR spectrum of fraction COB-A in  $\text{CDCl}_3$ .

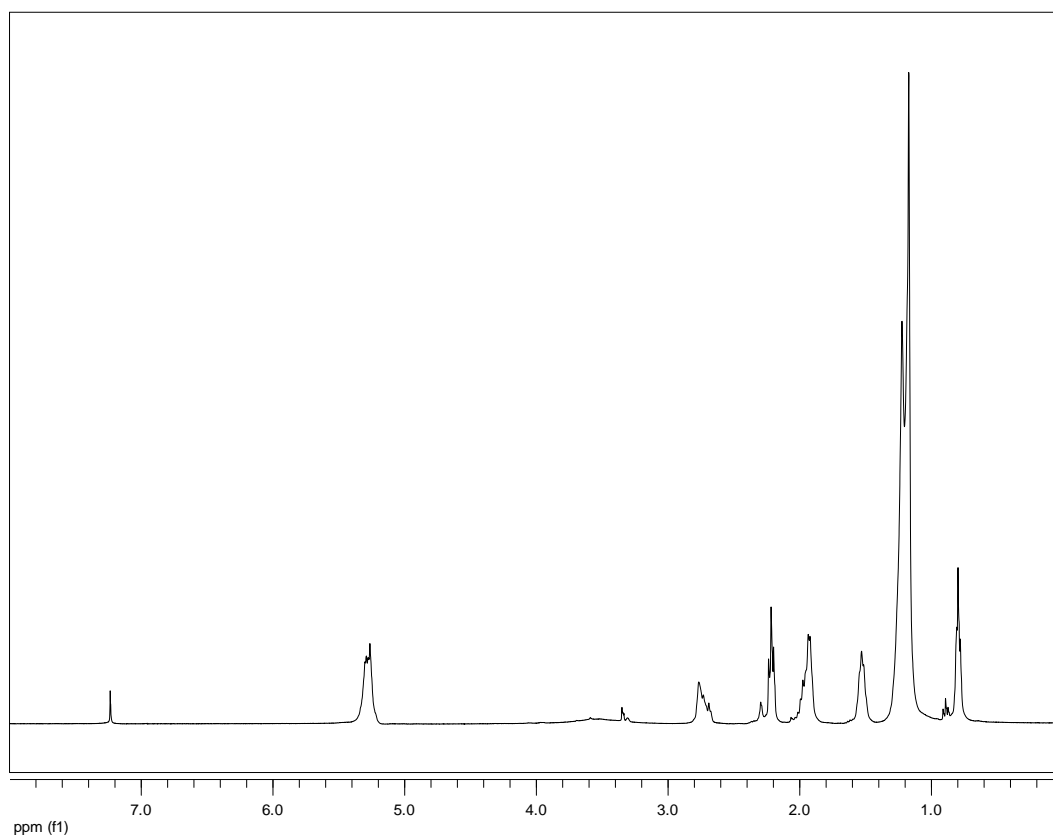

**Figure S5.**  $^1\text{H}$  NMR spectrum of fraction COB-B in  $\text{CDCl}_3$ .

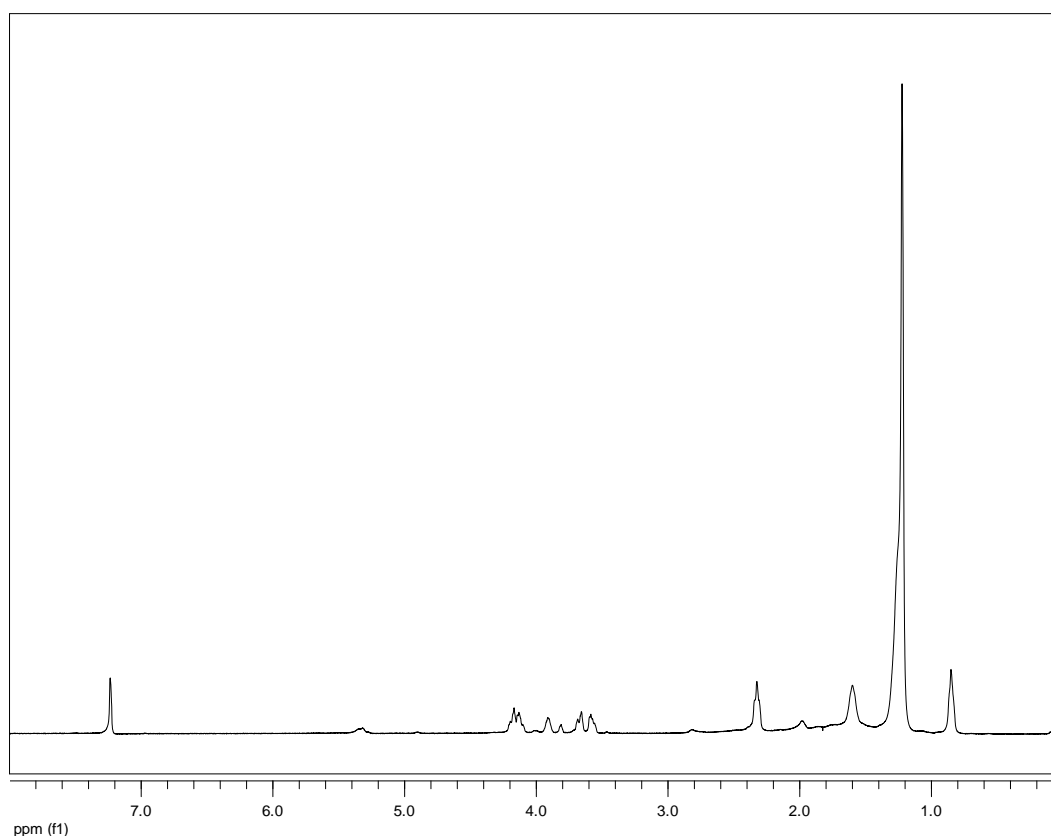

**Figure S6.**  $^1\text{H}$  NMR spectrum of fraction COB-C in  $\text{CDCl}_3$ .

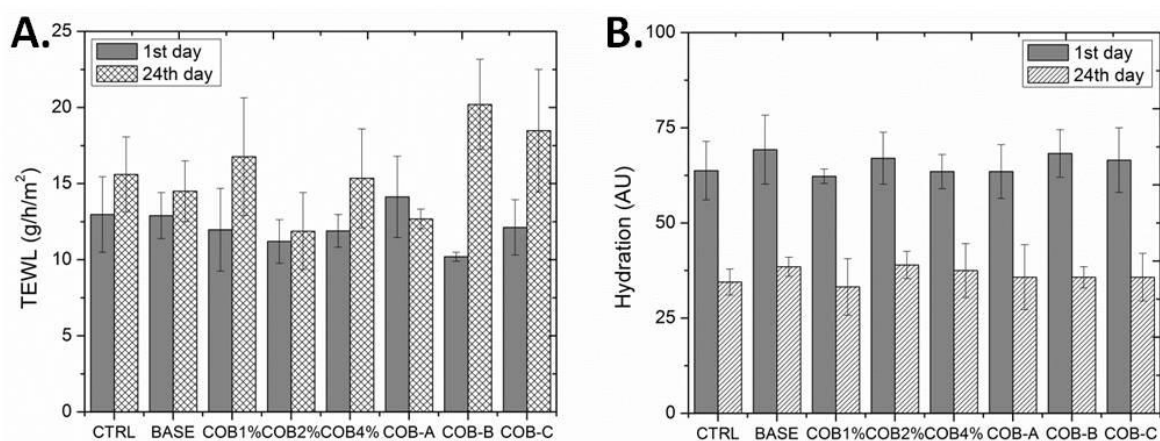

**Figure S7.** (A) TEWL values for the various mice groups receiving different treatments (no treatment, control; ointment base, BASE; 1%, 2%, and 4%  $\text{CH}_2\text{Cl}_2$  extract, COB1%; COB2% and COB4%, respectively; 0.3% COB-A fraction, COB-A; 0.3% COB-B fraction; COB-B; 0.3% COB-C fraction, COB-C) on day 1 and day 24 of the experiment. (B) Hydration values for the various mice groups on day 1 and day 24 of the experiment. Values are presented as the mean  $\pm$  SD ( $n=4$  mice per group). One-way ANOVA followed by Tukey's test was applied for comparison between the treated mice and the control ( $*p<0.05$  vs control).
